# Supplementary material for: Selection of suitable reference genes for qRT-PCR normalization during leaf development and hormonal stimuli in tea plant (Camellia sinensis)
Source: PubMed Central journal article supplement (PMC4728435; doi:10.1038/srep19748), 2016-01-27
Supplement: srep19748-s1.pdf [file srep19748-s1.pdf]

**Selection of suitable reference genes for qRT-PCR normalization  
during leaf development and hormonal stimuli in tea plant  
(*Camellia sinensis*)**

Zhi-Jun Wu<sup>1</sup>, Chang Tian<sup>2</sup>, Qian Jiang<sup>2</sup>, Xing-Hui Li<sup>1</sup>, Jing Zhuang<sup>1\*</sup>

<sup>1</sup>*Tea Science Research Institute, College of Horticulture, Nanjing Agricultural University, Nanjing, 210095, China*

<sup>2</sup>*State Key Laboratory of Crop Genetics and Genetics and Germplasm Enhancement, College of Horticulture, Nanjing Agricultural University, Nanjing, 210095, China*

\*Please address all correspondence to: J. Zhuang ([zhuangjing@njau.edu.cn](mailto:zhuangjing@njau.edu.cn))

-----

Dr. Jing Zhuang

Professor

Tea Science Research Institute,

College of Horticulture,

Nanjing Agricultural University,

Nanjing, 210095, China

Fax: 86 25 84395182

Email: [zhuangjing@njau.edu.cn](mailto:zhuangjing@njau.edu.cn)

***Running title:*** Suitable reference genes in tea plant

# Supporting Information

**Figure S1.** Photograph of *C. sinensis* cv. ‘Longjing43’.

The tea plants of ‘Longjing43’ are two-year-old cutting seedlings.

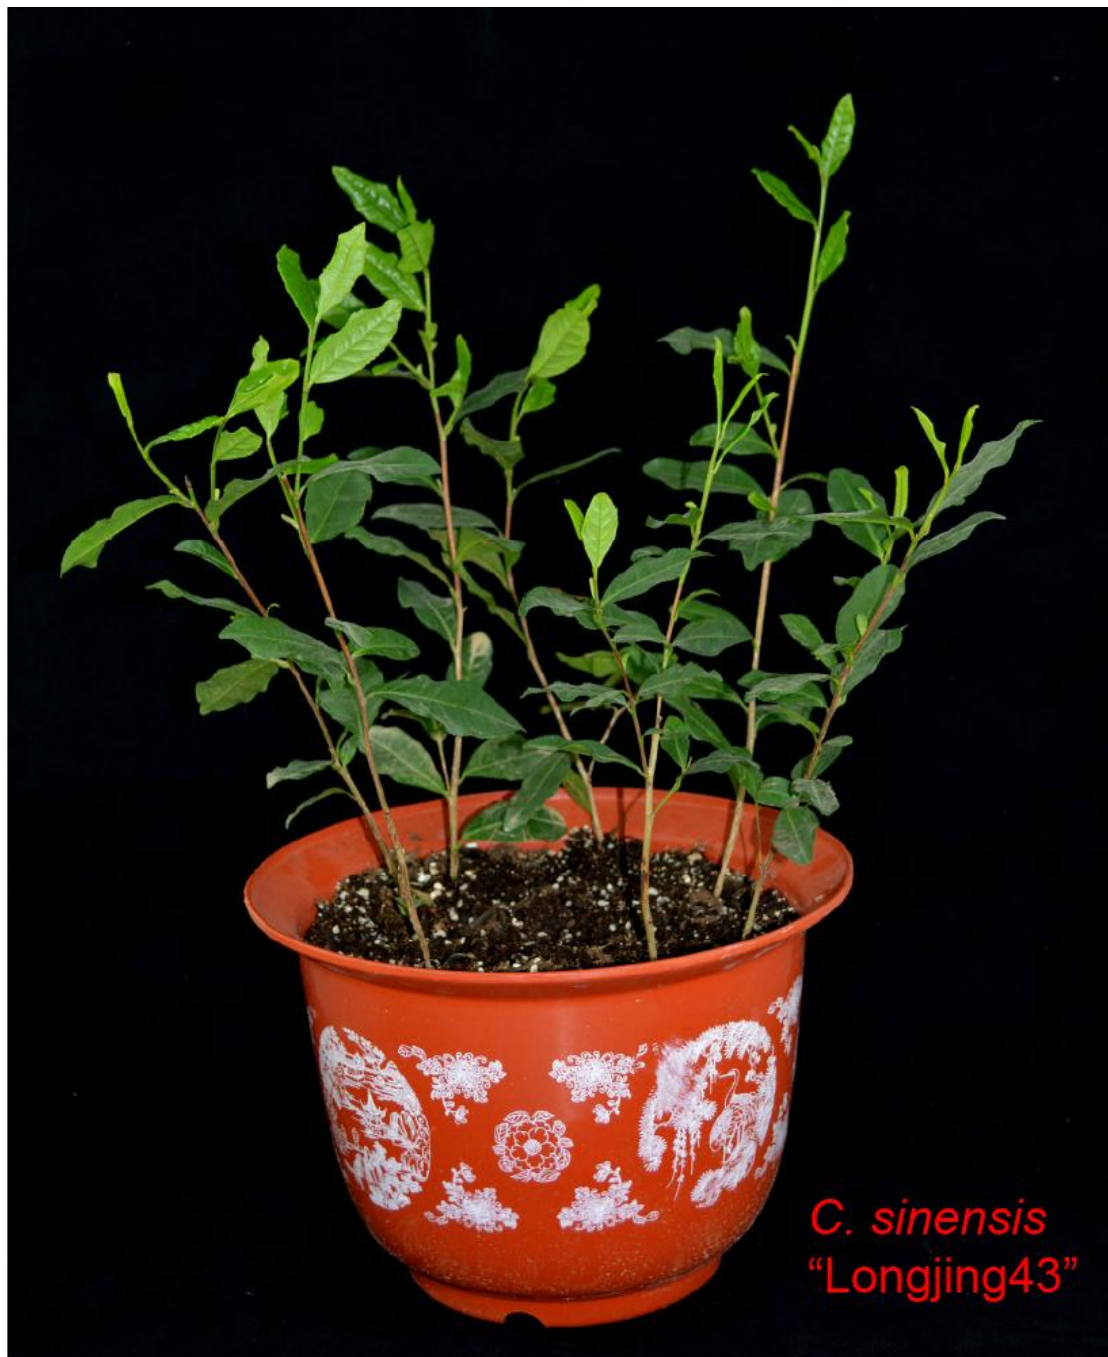

**Figure S2.** Nucleotide and deduced amino acid sequences of *CsACT7* from *C.*

*sinensis*.

```
1   ATGGCTGATGCTGAGGATATTCAGCCCCTGTCTGTGACAATGGAAGTGAATGGTGAAGGCTGGGTTTGCT
   M A D A E D I Q P L V C D N G T G M V K A G F A
73  GGTGATGATGCTCCAGGGCAGTTTTCCCAGTATTGTAGGTCGACCCAGGCACACTGGTGCATGGTTGGG
   G D D A P R A V F P S I V G R P R H T G V M V G
145 ATGGCCAGAAAGATGCTTATGTAGGTGATGAAGCCCAATCCAAAAGAGGTATTCTTACCTGAAATACCCA
   M G Q K D A Y V G D E A Q S K R G I L T L K Y P
217 ATTGAACATGGCATTGTCAGCAATTGGGATGACATGGAGAAGATCTGGCATCATACTTTCTATAACGAGCTC
   I E H G I V S N W D D M E K I W H H T F Y N E L
289 CGTGTGCCCTGAAGAGCACCCAGTACTTCTTACAGAAGCACCCTGAACCCGAAGGCAAATAGGGAGAAG
   R V A P E E H P V L L T E A P L N P K A N R E K
361 ATGACTCAAATTATGTTTGAGACCTTCAATGTGCCCGCCATGTATGTTTCTATCCAGGCAGTTCTGTCTCTT
   M T Q I M F E T F N V P A M Y V S I Q A V L S L
433 TATGCCAGTGGTCGTACAACAGGTATTGCTTGGATTCTGGGGATGGTGTAGCCACACAGTGCCAATTAC
   Y A S G R T T G I V L D S G D G V S H T V P I Y
505 GAAGTTATAACCCTCCACATGCAATCCTTCGGTTGACCTTGCTGGTCGTGATCTAACAGATTCATTGATG
   E G Y T L P H A I L R L D L A G R D L T D S L M
577 AAGATCCTCACTGAGCGAGGGTACTCCTTACCACAACAGCTGAACGGGAAATGTCCGTGATGTGAAAGAG
   K I L T E R G Y S F T T T A E R E I V R D V K E
649 AAACCTGCTTATGTTGCCCTTGATTACGAGCAGGAGTTGGAACTGCAAAGAGCAGCTCTGCAGTGGAGAAA
   K L A Y V A L D Y E Q E L E T A K S S S A V E K
721 AGCTATGAACTTCTGATGGGCAAGTGATCACTATCGGAGCAGAGAGATTCCGCTGCCCTGAAGTTCTATTC
   S Y E L P D G Q V I T I G A E R F R C P E V L F
793 CAGCCATCGCTCATTGGAATGGAAGTTGCTGGAATCCACGAATCCACCTACAACCTCCATCATGAAATGTGAT
   Q P S L I G M E V A G I H E S T Y N S I M K C D
865 GTTGATATCAGGAAGGATCTCTATGAAACATTGTCCTTAGTGGTGGATCAACCATGTTCCCAGGGATTGCT
   V D I R K D L Y G N I V L S G G S T M F P G I A
937 GACCGGATGAGCAAGGAAATCACTGCCCTTGCTCCTAGTAGCATGAAGATCAAAGTGGTGGCACCTCCTGAG
   D R M S K E I T A L A P S S M K I K V V A P P E
1009 AGAAAGTACAGTGTCTGGATTGGAGGCTCAATCTTGGCATCTCTCAGCACATTCCAGCAGATGTGGATATCC
   R K Y S V W I G G S I L A S L S T F Q Q M W I S
1081 AAGGATGAATATGATGAATCTGGTCCAGCCATTGTCCACAGGAAGTGCTTTTGA
   K D E Y D E S G P A I V H R K C F *
```

**Figure S3.** Nucleotide and deduced amino acid sequences of *CsEF-1 $\alpha$*  from *C.*

*sinensis*.

```
1   ATGGGTAAGGAAAAAGTTCACATTAACATTGTGGTCATTGGCCATGTCGACTCTGGGAAGTCAACCACCACT
   M G K E K V H I N I V V I G H V D S G K S T T T
73  GGTTCATCTCATCTACAAGCTTGGAGGTATTGACAAGCGTGTGATTGAGAGGTTTGAGAAGGAGGCTGCTGAG
   G H L I Y K L G G I D K R V I E R F E K E A A E
145 ATGAACAAACGTTTCATTCAAGTATGCCTGGGTCTTGACAAGCTCAAGGCTGAACGTGAACGTGGTATTACC
   M N K R S F K Y A W V L D K L K A E R E R G I T
217 ATTGATATTGCTTTGTGGAAGTTTGAGACCACCAAGTACTACTGCACTGTCATTGATGCCCTGGCCATCGT
   I D I A L W K F E T T K Y Y C T V I D A P G H R
289 GACTTTATCAAGAACATGATCACTGGTACCTCACAGGCTGACTGTGCAGTCTTATCATTGACTCAACAAC
   D F I K N M I T G T S Q A D C A V L I I D S T T
361 GGTGGGTTTGAAGCTGGTATTTCCAAGGATGGTCAGACACGTGAGCATGCTTTGCTTGCCTTTACCCTTGGT
   G G F E A G I S K D G Q T R E H A L L A F T L G
433 GTCAAGCAAATGATCTGCTGTTGCAACAAGATGGATGCAACAACCCCAAAGTATTCAAAGGCAAGGTATGAT
   V K Q M I C C C N K M D A T T P K Y S K A R Y D
505 GAAATTGTTAAGGAAGTGTCTTCTATCTGAAGAAGGTGGGTATAACCCTGACAAGATCCCTTTGTCCCA
   E I V K E V S S Y L K K V G Y N P D K I P F V P
577 ATCTCTGGATTTGAGGGTGACAACATGATTGAAAGTCAACCAACCTTGACTGGTACAAGGCCCAACCCCTG
   I S G F E G D N M I E R S T N L D W Y K G P T L
649 CTCGATGCCCTTGACATGATTTGGAACCAAGAGGCCCTCGACAAGCCTCTCCGCTCCCACCTCAGGAC
   L D A L D M I S E P K R P S D K P L R L P L Q D
721 GTCTACAAGATTGGTGGCATTGGCACTGTCCCTGTTGGCCGTGTTGAGACTGGTTAATCAAACCCGGCATG
   V Y K I G G I G T V P V G R V E T G L I K P G M
793 GTTGTCACTTTTGGCCCAACTGGTCTCACCCTGAAGTTAAGTCAGTAGAAATGCACCACGAGGCTCTCCTG
   V V T F G P T G L T T E V K S V E M H H E A L L
865 GAGGCCCTACCAGGCGACAATGTTGGTTTCAATGTAATAAATGTTGCTGTCAAGGATCTCAAACGGGGGTTT
   E A L P G D N V G F N V K N V A V K D L K R G F
937 GTTGCCTCAAACCTCAAGGACGATCCTGCAAAGGAAGCTGCCAACTTTACTTCCCAGGTCAATTATCATGAAC
   V A S N S K D D P A K E A A N F T S Q V I I M N
1009 CATCCTGGCCAAATTGAAAATGGTTATGCCCCAGTTCTCGATTGCCACACTCCCACATTGCAGTCAAATTT
   H P G Q I G N G Y A P V L D C H T S H I A V K F
1081 GCTGAGATTCTGACCAAGATTGACAGGAGTCTGGAAGGAGCTCGAGAAGGAGCCCAAATTTCTGAAGAAC
   A E I L T K I D R R S G K E L E K E P K F L K N
1153 GGTGATGCTGGGATGGTGAAGATGATTCACAAAGCCCATGGTGGTGGAGACTTTTTCCGAGTACCCACCA
   G D A G M V K M I P T K P M V V E T F S E Y P P
1225 CTTGGTCGTTTTGCTGTGAGAGACATGCGTCAAACCTGTTGCTGTTGGTGTATCAAGAGTGTGAGAAGAAG
   L G R F A V R D M R Q T V A V G V I K S V E K K
1297 GATCCATCTGGTGCCAAGGTCACCAAGGCTGCTCTGAAGAAGAAATGA
   D P S G A K V T K A A L K K K *
```

**Figure S4.** Nucleotide and deduced amino acid sequences of *CseIF-4α* from *C.*

*sinensis*.

```
1   ATGGCTGGCTTGGCACCTGAGGGTTCTCAATTTGATGCTCGTCAATTTGATGCCAAAATGAATGAGTACTT
   M A G L A P E G S Q F D A R Q F D A K M N E L L
73  GTGGCTGATGGAGAAGAATTCTCACCTCATATGACGAGGTTTATGAAAGCTTTGATGCAATGGGCTTACAA
   V A D G E E F F T S Y D E V Y E S F D A M G L Q
145 GAAAATCTCCTGAGGGGCATCTATGCTTATGGTTTTGAGAAGCCGTCTGCAATTCAGCAAAGGGGATAGTT
   E N L L R G I Y A Y G F E K P S A I Q Q R G I V
217 CCTTTCTGCAAAGGACTTGATGTAATTCACAAGCACAGTCTGGAAGTGGAAAACTGCAACATTCTGCTCT
   P F C K G L D V I Q Q A Q S G T G K T A T F C S
289 GGAATTCGCGAGCAGCTTGATTATAGCTTGGTTGAGTGCCAAGCTTTGGTTCTTGCAACCCACTCGTGAAC
   G I L Q Q L D Y S L V E C Q A L V L A P T R E L
361 GCCCAGCAAATGAGAAGGTTATGCGGAGCACTAGGTGTCTATCTTGGTGTGAAGGTTTCATGCTTGTGTTGA
   A Q Q I E K V M R A L G V Y L G V K V H A C V G
433 GGGACTAGTGTGCGGAAGATCAGCGCATTCTCTCAAGTGGGGTTCATGTTGTTGTTGGTACTCCTGGTCGT
   G T S V R E D Q R I L S S G V H V V V G T P G R
505 GTGTTTGACATGTTGCGGAGACAATCACTTCGCCCTGATTGCATCAAAATGTTTGTCTTGGATGAAGCTGAT
   V F D M L R R Q S L R P D C I K M F V L D E A D
577 GAAATGCTGTCACGAGGTTTTAAAGATCAGATCTATGATATTTCCAGTTGCTGCCACCCAAAATCCAGGTT
   E M L S R G F K D Q I Y D I F Q L L P P K I Q V
649 GGGGTGTTCTCTGCCACAATGCCACCAGAGGCTCTTGAATCACCAGGAAATTCATGAATAAGCCTGTGAGG
   G V F S A T M P P E A L E I T R K F M N K P V R
721 ATTCTTGTGAAACGTGACGAACCTACTCT*GAGGGTATCAAGCAATTTTATGTGAATGTTGACAAGGAGGAA
   I L V K R D E L T * E G I K Q F Y V N V D K E E
793 TGGAAGCTTGAGACACTTTGTGATCTCTATGAGACCTTGCCATAACCCAAAGCGTCATCTTTGTTAACACC
   W K L E T L C D L Y E T L A I T Q S V I F V N T
865 CGACGCAAGGTTGACTGGCTCACTGACAAAATGCGCAGCCGTGATCACACGGTATCTGCTACCCATGGAGAC
   R R K V D W L T D K M R S R D H T V S A T H G D
937 ATGGATCAGAACACTAGAGATATCATTATGCGGGAATCCGGTCTGGTTCCTCTCGTGTGCTTATCACAAC
   M D Q N T R D I I M R E F R S G S S R V L I T T
1009 GATCTTTTGGCTCGTGGTATTGATGTCCAGCAAGTCTCTTGTGATAAATTATGATCTGCCAACCCAACT
   D L L A R G I D V Q Q V S L V I N Y D L P T Q P
1081 GAGAACTACCTTCATCGAATTGGGCGTAGTGAAGGTTTGGGAGGAAGGTTGTCATCAACTTTGTGACC
   E N Y L H R I G R S G R F G R K G V A I N F V T
1153 AAAGATGATGAAAGGATGCTGGCTGACATCCAGAGGTTCTATAATGTGGTAGTTGAGGAGCTCCAGCAAA
   K D D E R M L A D I Q R F Y N V V V E E L P A N
1225 GTTGCTGATCTCCTTTGA
   V A D L L *
```

**Figure S5.** Nucleotide and deduced amino acid sequences of *CsGAPDH* from *C.*

*sinensis*.

```
1   ATGGCCACCCATGCTGCTCTGGCTTCTTCAAGAATCCCATCTCACACCTCGCTACTTCCCTCTAAGTCCTCT
   M A T H A A L A S S R I P S H T S L L P S K S S
73  CACTCCTCTGCTTCCCCACTCAATGCCTTCCCAAGAGACTGGAAGTAGCAGAGTTTCTGGTCTTCGATCC
   H S S C F P T Q C L S K R L E V A E F S G L R S
145 AGTGGACGTGTGACATACGCCAAGAATGCTAGGGAAGCATCCTTGTGTTGATGTAGTGGCTGCCAAGCAACT
   S G R V T Y A K N A R E A S L F D V V A A Q A T
217 CCCATGACTGCAGGTTCAACCCCTGTCAAGGGACAAACAGTGGCCAAATTAAGGTAGCAATTAATGGTTTT
   P M T A G S T P V K G Q T V A K L K V A I N G F
289 GGACGCATTGGCCGCAACTTTCTCCGGTGTGGCATGGCCGGAAGAAGTCCCCCGTTGATGTTATTGTGGTT
   G R I G R N F L R C W H G R K N S P V D V I V V
361 AACGACAGTGGTGGTCAAGAATGCATCTCACTGTGCTGAAGTATGATTCATTGTTGGGCACTTTCAAAGCA
   N D S G G V K N A S H L L K Y D S L L G T F K A
433 GAAGTAAAATAGTGGACAATGAGACCATCAGTGTGATGGTAAGCCCATCAAAGTTGTCTCTAGTAGGGAC
   E V K I V D N E T I S V D G K P I K V V S S R D
505 CCTTTGAAGCTCCCTTGGGCTGAACTAGGCATTGACATTGTTATTGAGGGGACAGGGGTGTTTGTGGATGGA
   P L K L P W A E L G I D I V I E G T G V F V D G
577 CCTGGGGCTGGAAGCACATCCAAGCTGGTGCCAAGAAAGTTATTACTGCTCCAGCAAAGGTGCCGAC
   P G A G K H I Q A G A K K V I I T A P A K G A D
649 ATTCCCACCTATGTTGTTGGAGTCAATGAAGGAGACTACGCCCATGATGTTTCTAACATTGTAAGCAATGCT
   I P T Y V V G V N E G D Y A H D V S N I V S N A
721 TCTTGACCACAACTGTTTAGCTCCTTTCGTGAAAGTCTTGATGAAGAACTCGGTATTGTCAAGGGACC
   S C T T N C L A P F V K V L D E E L G I V K G T
793 ATGACCACCACTATTCTACTGAGACCAGAGACTCTTAGATGCTTACACCCGGGACTTGAGGCGAGCC
   M T T T H S Y T G D Q R L L D A S H R D L R R A
865 AGAGCTGCAGCACTTAACATAGTCCCAACAAGCACCGGTGCAGCCAAGGCCGTGTCTCTAGTGCTTCCACAG
   R A A A L N I V P T S T G A A K A V S L V L P Q
937 CTCAAGGCAAGCTCAACGGCATTGCTCTCCGTGTTCCACACCAAATGTATCTGTGCTGTTGATCTTGTGTG
   L K G K L N G I A L R V P T P N V S V V D L V V
1009 AACGTCGCGAAAAAAGGAATATCTGCTGAAGACGTTAATGCTGCCTTTAGAAAAGCAGCCGATGGACCATTG
   N V A K K G I S A E D V N A A F R K A A D G P L
1081 AAGGGTATATTAGCCGTGTGTGATGTCCCTCTGTGTGTCAGTCGATTTTCAGGTGCTCTGATGTTTCTCCACC
   K G I L A V C D V P L V S V D F R C S D V S S T
1153 ATCGATTCATCTTTGACAATGGTCATGGGAGACGACATGGTCAAGGTAGTGGCATGGTACGACAATGAATGG
   I D S S L T M V M G D D M V K V V A W Y D N E W
1225 GGATACAGCCAACGTGTTGTCGATTTGGCACATTTGGTAGCAAGCAAGTGGCCAGGCATGCCTGCACAAGGA
   G Y S Q R V V D L A H L V A S K W P G M P A Q G
1297 AGTGGAGATCCATTGGAGGATTTTTGCGAGACAAGCCCTGCTGAGAAGGAGTGCAAGGTTTATGAAGCTTAA
   S G D P L E D F C E T S P A E K E C K V Y E A *
```

**Figure S6.** Nucleotide and deduced amino acid sequences of *CsPP2A* from *C.*

*sinensis*.

```
1   ATGATTAGGCAGATTCTGGGTAAGCTTCTCGGAAGCCATCGTCGAAATCATCACACAACGATTCGAACAAAT
   M I R Q I L G K L P R K P S S K S S H N D S N N
73  GATGGGGCGGTTTCAACTATGAATTCCTCGACTTGAATTCATGAATAGCAGCTCGAAAAGCACTACGGTT
   D G A V S T M N S S T W N S M N S S S K S T T V
145 TCTGGGAAAAGTTTCAATTTGGGTTCTGGTGCAGGTCGCTCTATCAATGGAACATATGCCCCAAACTCAATG
   S G K V S N L G S G A G R S I N G T Y A P N S M
217 AGTAAATCAAATCAAGGGAAGAAATCGGGTCCCTTGCTGCTCAAGGTGGTGGACCGGTGTCGAATATTGCA
   S K S N Q G K K S G P L A A Q G G G P V S N I A
289 ACATATGAAGCTTTGCCAAGTTTTCTGATGTTCCAAACCCAGAAAAGCAGAATCTTTTCATTAGGAAGTTG
   T Y E A L P S F R D V P N P E K Q N L F I R K L
361 AAAATGTGTGTGTTGCTTTGATTTAGTGACCCCTCTAAGAATATCAAAGAGAAGGATATAAAGCGGCAG
   K M C C V V F D F S D P S K N I K E K D I K R Q
433 ACATTGCTTGAAGCTTGTGATTATATCTCCACTGTAATTCAAAGTTCAATGAGGTCACAATGCAGGAAATT
   T L L E L V D Y I S T V N S K F N E V T M Q E I
505 ACAAAAATGGTAGCTACCAATTTATTCAGAACTTTCTATCCACTAATCATGAAAGCAAGTCACCTGATATG
   T K M V A T N L F R T F L S T N H E S K S P D M
577 TATGATGCAGAAGAAGAGGAAGTGGCGACGGAACCATCGTGGCCTCATCTCAGATTGTGTATGAATTTCTA
   Y D A E E E E L A T E P S W P H L Q I V Y E F L
649 CTTAGATTTGTGGCTTCGTCAGAGACAGATGCCAAGCTTGCTAAAAGATATGTAGACCATTGCTTTGTGTTG
   L R F V A S S E T D A K L A K R Y V D H S F V L
721 CGTTTGTGGACCTGTTGACTCTGAGGATCAAAGAGAGAGGAGTACTTGAAGACGATTCTCCACCGCATT
   R L L D L F D S E D Q R E R E Y L K T I L H R I
793 TATGGGAAGTTTATGGTGCATCGGCCATACATTAGGAAAGCCATCAACAATATCTTCTACCGTTTTATCTTT
   Y G K F M V H R P Y I R K A I N N I F Y R F I F
865 GAGACAGAGAAGCACAATGGGATAGCAGAATTGCTTGAGATCTTGGGCAGTATTATTAATGGTTTTGCTTTG
   E T E K H N G I A E L L E I L G S I I N G F A L
937 CCTTTAAAGGAAGAGCACAAGCTTTTCTTGTCCGTGCCTTGATTCCACTTCACAAGCCCAAGTGTGTAGCC
   P L K E E H K L F L V R A L I P L H K P K C V A
1009 ATGTATACCAACAACCTTTCATATTGCATCACTCAGTTTGTGGAGAAGGATATAAAGCTAGCTGACACGGTA
   M Y H Q Q L S Y C I T Q F V E K D I K L A D T V
1081 ATTCGTGGTCTTTTAAAGTATTGGCCATTAACAGTTCAAAGGAGGTGATGTTCTCGGTGAGTTGGAA
   I R G L L K Y W P L T N S S K E V M F L G E L E
1153 GAAGTTCTAGAAGCCACACAGGCTGCAGAATTCAGCGCTGCATGGTCCCCCTTTTCCGTCAGATTGGACGC
   E V L E A T Q A A E F Q R C M V P L F R Q I G R
1225 TGCCTCAATAGCTTACATTTTTCAGGTGGCTGAGCGTGCCTTGTCTCTGGAACAACGATCACATTGGGAAT
   C L N S L H F Q V A E R A L F L W N N D H I G N
1297 TTGATCACGCAGAACCGTAAAGTAATACTGCCTATAATTTTCCCAGCCTTGAGAGAAAACACAGAAGTCAC
   L I T Q N R K V I L P I I F P A L E R N T R S H
1369 TGAACCAAGCTGTTTCAGAGCCTGACACTTAATGTGAGGAAGATATTTTCAGATGCTGACCAAGCACTGTT
   W N Q A V Q S L T L N V R K I F S D A D Q A L F
1441 GATGAGTGCCTAGTAAGATTCCAAGAAGATGAAATTAAGGAAAAGGAGGCTCAGGAGAAGCGGGAATCAACA
   D E C L V R F Q E D E I K E K E A Q E K R E S T
1513 TGAAGCGCTTGAAGATGTGGCAGCCTCAAGGCTGTTGTAAGTAATGAGGCTGTGCTTGTGAAGTTTGTG
   W K R L E D V A A S K A V V S N E A V L V K F V
1585 TCTTCTGTTGCCATTGCTACCAACAAAATCTGCGAACAACCTGTGGGTAGTTGA
   S S V A I A T N T N L R T T V G S *
```

**Figure S7.** Nucleotide and deduced amino acid sequences of *CsSAND* from *C.*

*sinensis*.

```
1 ATGGGGTCCGATTGGACTCCTCAACGTCCTCCGACGATCCCATACACGAAAGCCCTAATTCTACTTCAATC
M G S D L D S S T S S D D P I H E S P N S T S I
73 GATCAGTCCCTCGACGCCATCGAAGATCAATTAGCCTCAATCGCATTGACCCAACCGAACGGCGTTGCAGCC
D Q S L D A I E D Q L A S I A L T Q P N G V A A
145 GACGATGAATCGTCCGAGCAAGAAGTTTTCAAGGACACCCAAATGGGCTGCCTTTGGATGAGGACAGTAAT
D D E S S E Q E V F K D T P N G L P L D E D S N
217 CAGCAGGAGAGCAAGGGAGGTGAAATCGGAGAGGAGGGTTTTGGGAATTCAGTGCCTGAACCGTCTTCTGTG
Q Q E S K G G E I G E E G F G N S V P E P S S V
289 GAGTTTGAAGTTGTGGAGGAGGTTCCGGAGAGCTCGTCGAGTGGTGTTTTTGCGTGGAGGAGGACCAATTCG
E F E V V E E V R E S S S S G V F A W R R T N S
361 GAGCTCGAAGTTGAGCGGCAGGAGACCCAAGCAGTAGTGGGTATGCTGGTGAGAGAGGGAGTAGCAGTAGC
E L E V E R Q E S P S S S G Y A G E R G S S S S
433 ACCAGTGTGTCTGAGATTGAGGAGGTGGGTGAAGATCAAATTTGTGAAGTTGGAAGGATGATTCTGTTGAT
T S V S E I E E V G E D Q I C E V G K D D S V D
505 GGGGTTCCGATTGGGTTCCGGGAAGCGGCATCTCGATGAAGATGATGCTTCTGTTTCATGGAGGAAAAGG
G G S D W V P G K R H L D E D D A S V S W R K R
577 AAGAAGCACTTCTTTATTTGAGTAACTCTGGCAAACCAATATATTCCAGATACGGAGATGAACACAAGTTA
K K H F F I L S N S G K P I Y S R Y G D E H K L
649 GCGGGATTTTCGGTACTCTGCAAGCAATCATTTCTTCGTGGAGAATGGGGGCGATCGTGTGAAATTGGTA
A G F S A T L Q A I I S F V E N G G D R V K L V
721 AGGGCAGGCAAACACCAGGTAATTTTCTTGTGAAAGGACCAATCTACTTAGTTTGCATAAGCTGTACGGAG
R A G K H Q V I F L V K G P I Y L V C I S C T E
793 GAGCCTTATGAGTCATTAAGGG*CAATTGGAGCTTGTATGGGCAGATGATAGTTATTCTTACAAAGTCT
E P Y E S L R * Q L E L V Y G Q M I V I L T K S
865 GTAAACAGATGTTTCGAGAAGAATTCAAAGTTGATATGACACCTTTGCTTGAGAACAGATGTTGTCTTC
V N R C F E K N S K F D M T P L L G G T D V V F
937 TCTTCTCATCCATTCTTTCAGTTGGAACCCTGCCACTTTTCTTCATGCATACACGTGTCTTCCCGTTGCT
S S L I H S F S W N P A T F L H A Y T C L P V A
1009 TATGCGACAAGACAAGCTGCAGGTGCCATATTGCAAGATGTTGCTGATTACAGGTGCTCTGTTTGAATATTA
Y A T R Q A A G A I L Q D V A D S G V L F A I L
1081 ATGTGCAAAACAAGTTATCAGTCTTGTGGTGACAAAAAGCATCTCTTCATCCCGATGATATGCTCCTA
M C K H K V I S L V G A Q K A S L H P D D M L L
1153 CTTTCCAATTTTGTATGTCATCGGAATCATTTAGGACATCTGAATCTTTCTACCAATTTGCCTGCCAAGA
L S N F V M S S E S F R T S E S F S P I C L P R
1225 TATAATCCCATGGCATTTTTGTATGCTTATGTCCATTATCTTGATGTTGATACATACTTAATGTTGCTTACT
Y N P M A F L Y A Y V H Y L D V D T Y L M L L T
1297 ACCAGTTCAGATGCCTTTTTTCATCTTAAAGATTGCAGGATTCGTATCGAAATGGTCCTTTTGAAGTCAAAT
T S S D A F F H L K D C R I R I E M V L L K S N
1369 GTTCTCAGTGAAGTTCAGAAATCCATGCTAGATGGCGCATGCGTGTGAGGATTTGCCTGTTGATCCATCT
V L S E V Q K S M L D G G M R V E D L P V D P S
1441 CCTCGTTCTGGATATTCATCTGCTCATTTAGGTCAGCCAGACTTGCAACAGATTCTCCTGAGAGATTCCGG
P R S G Y S S A H L G Q P R L A T D S P E R F R
1513 GAAGCATTGTTGGTATTGGTGGTCTGCTGGACTTTGGAATTCATATATCGTAGTATTTACTTGGACCAA
E A F V G I G G P A G L W N F I Y R S I Y L D Q
1585 TATGTATCTTCTGAGTCTCTTCGCAATCAGTAGTTCGCGACAGCAGAAAAGATTGTATAGAGCTTACCAA
Y V T S E F S S P I S S S R Q Q K R L Y R A Y Q
1657 AAACCTTATGCTCCATGATGAGGAAGGAGTTGGACCCACAAAACACTAGTTTAGAAGAGATGAGAAGTAA
K L Y A S M H E E G V G P H K T Q F R R D E N Y
1729 GTTTTACTATGCTGGTCAACCAGGACTTTGAACTCTATGCTGCATTGATCCCTGGCACACAAGGCTTTG
V L L C W V T Q D F E L Y A A F D P L A H K A L
1801 GCAATAAAGACTTGCAACCGGTGTGTCAATGGGTGAAAGATGTGAAAATGAGATCTTCTGTTGGGAGCC
A I K T C N R V C Q W V K D V E N E I F L L G A
1873 AGCCCTTTTCATGGTGA
S P F S W *
```



**Figure S8.** Nucleotide and deduced amino acid sequences of *CsTBP* from *C. sinensis*.

1 ATGGCGGATCAAGTGTGGGAAGGGAGCCAACCCGTGGATCTCTCCAAGCACCCGTCTGGCATCGTTCCTACT  
M A D Q V L E G S Q P V D L S K H P S G I V P T  
73 CTTCAGAATATTGTGTCAACAGTGAACCTCGATTGCAAGTTAGATCTCAAAGCCATTGCTTTGCAAGCTCGT  
L Q N I V S T V N L D C K L D L K A I A L Q A R  
145 AATGCCGAATACAATCCCAAGCGTTTTGCTGCTGTTATTATGAGGATAAGGGATCCAAAGACGACAGCTTTG  
N A E Y N P K R F A A V I M R I R D P K T T A L  
217 ATTTTTGCCTCTGGGAAGATGGTTTGCCTGGTGCAAAGAGCGAACAACCTTTCAAACCTGGCAGCAAGAAAAG  
I F A S G K M V C T G A K S E Q L S K L A A R K  
289 TATGCACGAATTATTCAAAGCTTGGGTTTCCTGCCAAATTCAAGGATTCAAGATTCAGAACATAGTTGGT  
Y A R I I Q K L G F P A K F K D F K I Q N I V G  
361 TCCTGTGACGTAAAATTTCCCATCAGACTTGAAGGTCTGCATATTCCCATGGTGCCTTTTCAAGTTATGAA  
S C D V K F P I R L E G L A Y S H G A F S S Y E  
433 CCAGAACTATTTCCAGGCTTAATATATCGTATGAAGCAACCAAAGATTGTGCTACTCATCTTTGTTTCTGGA  
P E L F P G L I Y R M K Q P K I V L L I F V S G  
505 AAGATTGTCCTACGGGAGCCAAGGTGAGGGATGAGACATATACAGCCTTCGAGAACATATACCCTGTCCTT  
K I V L T G A K V R D E T Y T A F E N I Y P V L  
577 ACTGAGTTCAGGAAGAATCAACAATGGTAG  
T E F R K N Q Q W \*

**Figure S9.** Nucleotide and deduced amino acid sequences of *CsTIP41* from *C.*

*sinensis*.

```
1  ATGGAGTTGGAAGTGGACGAGACCGAGCTCAAAGCCGCCGAGCTCAGCTTCTCCGGAAGGACGCGTTGGA
   M E L E V D E T E L K A A G A Q L L P E G R V G
73  CTCTTCATACATGGTTGGGAGATCGAGTCTCGAAGCGTCCCATTCTCAACTCTCTCCACCTCCAACAGTGG
   L F I H G W E I E S R K R P I L N S L H L Q Q W
145 GAGCATAAGCTTCAAACATCCCACCTTCCAGAGATGGTTTTTGGGGACAGTTCTTTGGTTCTTAAACATGTC
   E H K L Q T S H F P E M V F G D S S L V L K H V
217 AGTAGTGGCATTAAAGATTCATTTTAATACATTTGATGCTCTAACTGCCTGGAAGCAGGAAGCATTGCCACCA
   S S G I K I H F N T F D A L T A W K Q E A L P P
289 GTTGAAGTTCCTGCAGCTGAAAATGAAAATTGAGAAGCCAACCCTCCAGCAATTGGATTATGACTATACC
   V E V P A A A K W K F R S Q P F Q Q L D Y D Y T
361 TTTACAACACCATATTGTGGAAGTCAAACGATTGAGATAAATGAAGAGCTTGCAGAGGAGCAACCTCTGAA
   F T T P Y C G S Q T I E I N E E L A R G A T S E
433 GATAACAACCTGTGGTCTTTATTGGGAGGACTGCAAAGAGCAAATTGATTTGGCTGCACTGGCATCGAAAGAG
   D N N C G L Y W E D C K E Q I D L A A L A S K E
505 CCCATTCTTCTATGATGAGGTAATCTTGATGAAGATGAATTGGCGGATAGTGGTGTTCACTTTTAACT
   P I L F Y D E V I L Y E D E L A D S G V S L L T
577 GTAAAAGTGAGGGTAATGCCAAACTCTGGTTTCTTCTTGCCTTTTGGCTTAGAGTTGATGGGGTGCTT
   V K V R V M P N S W F L L L R F W L R V D G V L
649 ATGAGATTGAGGGACACACGTATGCATTGTGTTTTGCAAATAGTGCAACCCCATTTCTTCGAGAAAAGC
   M R L R D T R M H C V F A N S A T P I I L R E S
721 TGTTGGAGGGAAGCCACATTTAAAGCTTTGTCTGCAAAGGATACCCATCTGATTCTGCGGCATATAATGAT
   C W R E A T F K A L S A K G Y P S D S A A Y N D
793 CCAAGCATCATCAGCCAGAGGCTTCCTATCATCATGCATAAGTCCCAAAGCTTAAATCCCTGGTAACCTA
   P S I I S Q R L P I I M H K S Q K L K I P G N L
865 TAA
```

\*

**Figure S10.** Nucleotide and deduced amino acid sequences of *CsTUB* from *C.*

*sinensis*.

```
1   ATGAGAGAGATTCTTCACATTCAAGGTGGACAGTGGCGAAATCAGATCGGATCAAAATTTGGGAAGTTGTT
   M R E I L H I Q G G Q C G N Q I G S K F W E V V
73  TGTGATGAACATGGCATAGATCCTACTGGAAGATATGTTGGAACCTCAGATTTGCAGCTCGAACGTGTCAAT
   C D E H G I D P T G R Y V G T S D L Q L E R V N
145 GTCTACTACAATGAGGCTTCTTGTGGGAGGTTTGTTCCTCGTGCTGTGCTCATGGATCTTGAGCCGGGCACC
   V Y Y N E A S C G R F V P R A V L M D L E P G T
217 ATGGACAGTGTTCGCACTGGTCCGTATGGCCAGATCTTCCGCCCTGATAACTTTGTTTTCGGTCAGTCTGGT
   M D S V R T G P Y G Q I F R P D N F V F G Q S G
289 GCTGAAATAACTGGCCAAAGGACATTACACTGAGGGTGCAGAACTTATTGATTCACTTCTTGATGTGTG
   A G N N W A K G H Y T E G A E L I D S V L D V V
361 AGGAAGGAGCCGAGAAGTGTGACTGTCTTCAAGGTTTTCAAGTCTGCCATTCCTGGGTGGAGGAACAGGT
   R K E A E N C D C L Q G F Q V C H S L G G G T G
433 TCTGGGATGGGTACCTTGCTAATTTCAAAAATTAGGGAGGAGTACCCTGACAGGATGATGCTCACATTCTCT
   S G M G T L L I S K I R E E Y P D R M M L T F S
505 GTGTTCCCATCGCCAAAGGTTTCAGATACTGTTGTTGAGCCATAACAATGCTACCCTTTCTGTCCACCAGCTT
   V F P S P K V S D T V V E P Y N A T L S V H Q L
577 GTTGAGAATGCAGATGAGTGCATGGTGCTTGATAATGAAGCTCTATATGATATCTGTTTCAGGACTCTTAAG
   V E N A D E C M V L D N E A L Y D I C F R T L K
649 CTTACCACTCCTAGCTTTGGCGATCTGAACCACTGATATCTGCAACCATGAGTGGTGTCACTTGCTGCCTT
   L T T P S F G D L N H L I S A T M S G V T C C L
721 CGATTCCCTGGTCAACTCAATTCTGATCTCCGAAAGCTTGCTGTAACCTTATCCCTTTTCCCGTCTACAC
   R F P G Q L N S D L R K L A V N L I P F P R L H
793 TTCTTCATGGTGGGTTTTGCTCCGCTGACTTCACGTGGGTCCCAGCAATACCGAGCCCTTACTGTCCCTGAA
   F F M V G F A P L T S R G S Q Q Y R A L T V P E
865 CTGACCAACAAATGTGGGATGCAAAGAACATGATGTGTGTGCTGACCCACGACATGGCCGCTACCTCACT
   L T Q Q M W D A K N M M C A A D P R H G R Y L T
937 GCTTCAGCCATGTTCAAGGGTAAAATGAGCACCAAGGAAGTGGATGAACAAATGATCAACGTTCAAAACAAG
   A S A M F R G K M S T K E V D E Q M I N V Q N K
1009 AACTCTTCTACTTTGTGGAGTGGATCCCTAACAAATGTGAAATCGAGCGTCTGTGACATTCCACCTAGGGGA
   N S S Y F V E W I P N N V K S S V C D I P P R G
1081 CTTTCCATGGCATCAACCTTTATTGGAATTC AACCTCCATT CAGGAAATGTT CAGGAGAGT GAGT GAGCAG
   L S M A S T F I G N S T S I Q E M F R R V S E Q
1153 TTCACTGCTATGTT CAGGAGGAAGGCTTCTTG CATTGGTATACTGGCGAAGGTATGGATGAAATGGAGTTC
   F T A M F R R K A F L H W Y T G E G M D E M E F
1225 ACAGAAGCCGAGAGCAACATGAATGATCTAGTGTGCGAGTACCAGCAGTACCAGGATGCTACTGCTGATGAG
   T E A E S N M N D L V S E Y Q Q Y Q D A T A D E
1297 GAGGGCGAATATGATGATGAGGAGGAAGAAGGTATGGAGGACATGTGA
   E G E Y D D E E E E G M E D M *
```

**Figure S11.** Amplification of qRT-PCR specific primers.

Amplified fragments of nine candidate reference genes in *C. sinensis* were separated by 1.2% agarose gel electrophoresis. M: marker 2000.

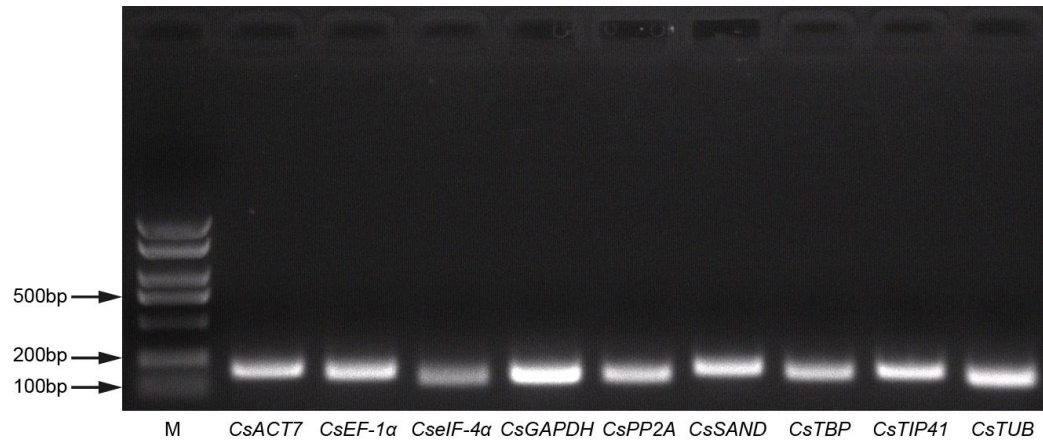

**Figure S12.** Standard curves of each candidate genes.

Standard curves of *CsACT7*, *CsEF-1 $\alpha$* , *CseIF-4 $\alpha$* , *CsGAPDH*, *CsP2A*, *CsSAND*, *CsTBP*, *CsTIP41*, and *CsTUB*. The linear correlation ( $R^2$ ) and PCR efficiencies (% E =  $(10^{[-1/\text{slope}]} - 1) \times 100\%$ ) were calculated from the standard curve.

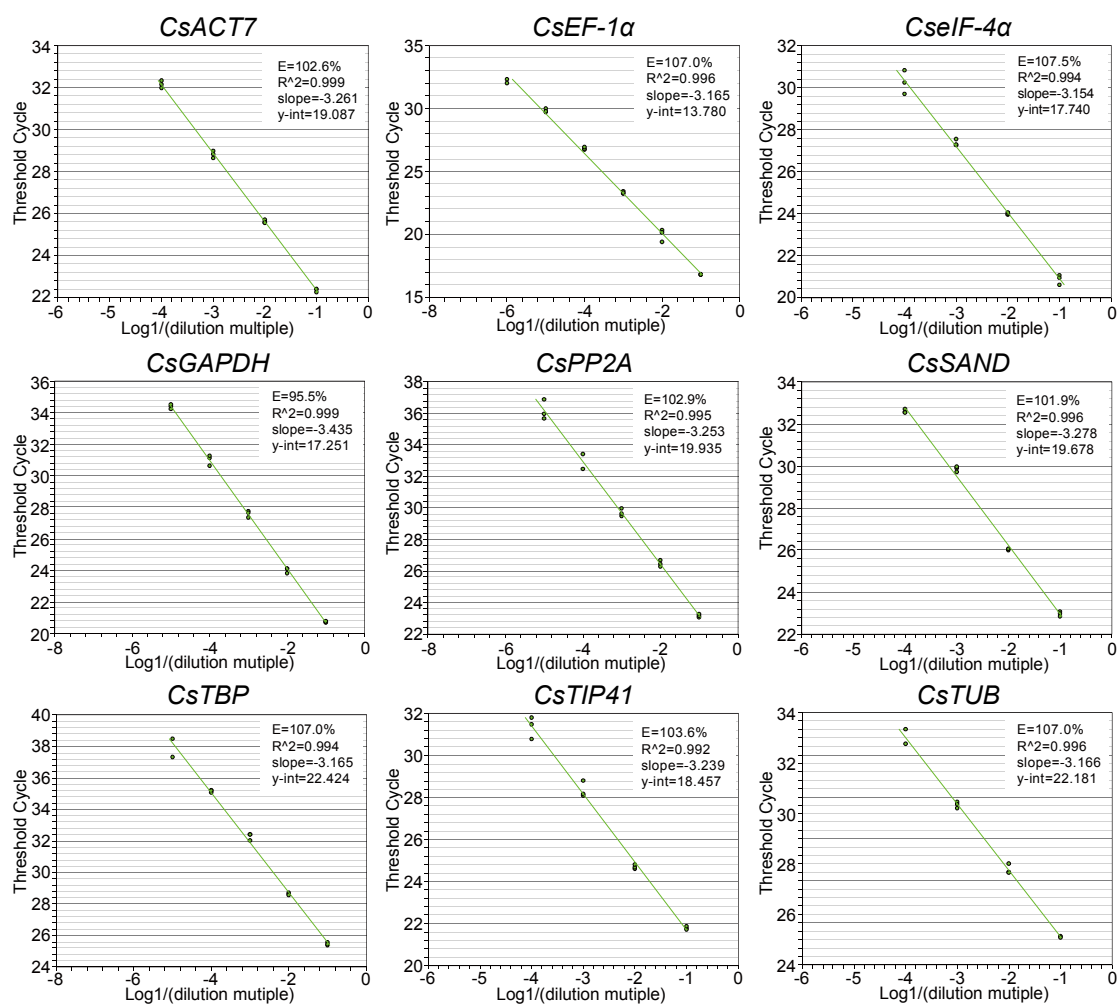

**Table S1.** Primer sequences for cloning of nine reference genes from *C. sinensis*

| <b>Gene symbol</b>                | <b>Primer sequence (5'–3') forward/reverse</b>          | <b>Amplicon length (bp)</b> | <b><i>Arabidopsis</i> homolog gene</b> | <b>Identity (%)</b> |
|-----------------------------------|---------------------------------------------------------|-----------------------------|----------------------------------------|---------------------|
| <i>CsACT7</i>                     | ATGGCTGATGCTGAGGATATTCAGC<br>TCAAAAGCACTTCCTGTGGACAATG  | 1134                        | AT5G09810                              | 96.82               |
| <i>CsEF-1<math>\alpha</math></i>  | ATGGGTAAGGAAAAAGTTCACATTA<br>TCATTTCTTCTTCAGAGCAGCCTT   | 1344                        | AT5G60390                              | 95.77               |
| <i>CseIF-4<math>\alpha</math></i> | ATGGCTGGCTTGGCACCTGAG<br>TCAAAGGAGATCAGCAACATTTGCT      | 1241                        | AT3G13920                              | 92.74               |
| <i>CsGAPDH</i>                    | ATGATAACTGAAAAAACAATGTAA<br>TTAAGCTTCATAAACCTTGCACT     | 1368                        | AT1G42970                              | 83.99               |
| <i>CsPP2A</i>                     | ATGATTAGGCAGATTCTGGGTAAGC<br>TCAACTACCCACAGTTGTTTCGCAG  | 1638                        | AT3G21650                              | 73.32               |
| <i>CsSAND</i>                     | ATGGGGTCCGATTTGGACTCCT<br>TCACCATGAAAAGGGGCTGGCT        | 1890                        | AT2G28390                              | 64.09               |
| <i>CsTBP</i>                      | ATGGCGGATCAAGTGTTGGAA<br>CTACCATTGTTGATTCTTCCTGAAC      | 606                         | AT1G55520                              | 93.03               |
| <i>CsTIP41</i>                    | ATGGAGTTGGAAGTGGACGAGA<br>TTATAGGTTACCAGGGATTTTAAGC     | 867                         | AT4G34270                              | 67.24               |
| <i>CsTUB</i>                      | ATGAGAGAGATTCTTCACATTCAAG<br>TCACATGTCCCTCCATACCTTCTTCC | 1344                        | AT5G12250                              | 96.66               |

**Table S2.** Raw Cq values of nine reference genes in *C. sinensis*.

Plant material samples from different development leaves and hormone treatments.

|               | <i>CsACT7</i> | <i>CsEF-1<math>\alpha</math></i> | <i>CseIF-4<math>\alpha</math></i> | <i>CsGAPDH</i> | <i>CsPP2A</i> | <i>CsSAND</i> | <i>CsTBP</i> | <i>CsTIP41</i> | <i>CsTUB</i> |
|---------------|---------------|----------------------------------|-----------------------------------|----------------|---------------|---------------|--------------|----------------|--------------|
| First-leaf-1  | 23.00         | 20.08                            | 24.78                             | 23.53          | 26.76         | 25.56         | 25.54        | 25.08          | 22.62        |
| First-leaf-2  | 23.24         | 20.39                            | 24.59                             | 23.47          | 26.66         | 25.67         | 25.42        | 24.93          | 22.51        |
| First-leaf-3  | 22.78         | 20.09                            | 24.36                             | 23.19          | 26.49         | 25.04         | 25.21        | 24.78          | 22.30        |
| First-leaf-4  | 22.51         | 19.38                            | 23.75                             | 22.43          | 26.37         | 25.51         | 25.13        | 24.67          | 21.74        |
| First-leaf-5  | 22.66         | 19.27                            | 23.75                             | 22.48          | 26.30         | 25.21         | 25.00        | 24.56          | 21.75        |
| First-leaf-6  | 22.55         | 19.24                            | 23.82                             | 22.66          | 26.33         | 25.13         | 24.98        | 24.59          | 21.85        |
| First-leaf-6  | 23.29         | 19.82                            | 24.53                             | 23.04          | 26.91         | 25.93         | 25.64        | 25.39          | 22.67        |
| First-leaf-8  | 23.69         | 20.20                            | 24.72                             | 23.40          | 27.28         | 26.21         | 25.82        | 25.68          | 22.89        |
| First-leaf-9  | 23.70         | 20.21                            | 24.55                             | 23.36          | 27.02         | 26.17         | 25.74        | 25.50          | 22.98        |
| Second-leaf-1 | 22.37         | 19.70                            | 24.41                             | 22.00          | 26.07         | 24.85         | 25.08        | 24.55          | 22.22        |
| Second-leaf-2 | 22.43         | 19.78                            | 24.07                             | 22.08          | 26.21         | 24.99         | 25.14        | 24.74          | 22.35        |
| Second-leaf-3 | 22.65         | 19.75                            | 24.18                             | 22.18          | 26.27         | 25.00         | 25.12        | 24.69          | 22.39        |
| Second-leaf-4 | 23.17         | 20.13                            | 24.55                             | 21.84          | 26.78         | 25.85         | 25.85        | 25.41          | 22.82        |
| Second-leaf-5 | 22.85         | 19.80                            | 24.37                             | 21.68          | 26.70         | 25.83         | 25.63        | 25.11          | 22.65        |
| Second-leaf-6 | 22.87         | 19.86                            | 24.23                             | 21.51          | 26.58         | 25.78         | 25.47        | 25.13          | 22.47        |
| Second-leaf-7 | 22.46         | 19.35                            | 23.94                             | 21.84          | 26.18         | 24.93         | 24.96        | 24.55          | 22.10        |
| Second-leaf-8 | 22.60         | 19.47                            | 23.95                             | 21.88          | 26.21         | 25.05         | 25.11        | 24.60          | 22.06        |
| Second-leaf-9 | 22.65         | 19.68                            | 24.06                             | 22.07          | 26.35         | 25.08         | 25.08        | 24.67          | 22.26        |
| Third-leaf-1  | 22.71         | 20.40                            | 24.68                             | 21.80          | 26.40         | 25.36         | 25.49        | 25.05          | 22.98        |
| Third-leaf-2  | 22.68         | 20.28                            | 24.48                             | 21.73          | 26.29         | 25.06         | 25.31        | 24.88          | 22.76        |
| Third-leaf-3  | 22.66         | 20.11                            | 24.44                             | 21.70          | 26.34         | 25.08         | 25.28        | 24.89          | 22.75        |
| Third-leaf-4  | 22.84         | 20.33                            | 24.71                             | 21.43          | 26.75         | 25.61         | 25.56        | 25.14          | 22.83        |
| Third-leaf-5  | 22.61         | 20.29                            | 24.64                             | 21.39          | 26.60         | 25.62         | 25.55        | 25.19          | 22.88        |
| Third-leaf-6  | 22.73         | 20.36                            | 24.65                             | 21.34          | 26.56         | 25.57         | 25.53        | 25.28          | 22.85        |
| Third-leaf-7  | 22.08         | 19.98                            | 24.04                             | 21.17          | 25.82         | 24.71         | 24.95        | 24.47          | 22.37        |
| Third-leaf-8  | 22.29         | 20.05                            | 23.92                             | 21.12          | 25.67         | 24.73         | 25.08        | 24.05          | 22.46        |
| Third-leaf-9  | 22.20         | 19.94                            | 24.09                             | 21.23          | 25.85         | 24.72         | 24.95        | 24.47          | 22.52        |
| Fourth-leaf-1 | 22.34         | 20.33                            | 24.46                             | 21.96          | 26.52         | 25.53         | 25.54        | 24.77          | 23.09        |
| Fourth-leaf-2 | 22.00         | 19.98                            | 24.08                             | 21.60          | 26.09         | 25.11         | 25.21        | 24.60          | 22.73        |
| Fourth-leaf-3 | 21.86         | 19.80                            | 24.01                             | 21.39          | 25.99         | 24.94         | 25.00        | 24.40          | 22.56        |
| Fourth-leaf-4 | 21.70         | 20.02                            | 24.16                             | 20.73          | 26.30         | 25.37         | 25.32        | 24.70          | 22.77        |
| Fourth-leaf-5 | 21.50         | 19.86                            | 24.17                             | 20.68          | 26.33         | 25.38         | 25.17        | 24.38          | 22.68        |
| Fourth-leaf-6 | 21.74         | 20.12                            | 24.25                             | 20.69          | 26.32         | 25.65         | 25.36        | 24.68          | 22.77        |
| Fourth-leaf-7 | 22.24         | 20.26                            | 24.43                             | 21.39          | 26.38         | 25.92         | 25.54        | 25.09          | 23.05        |
| Fourth-leaf-8 | 22.20         | 20.10                            | 24.52                             | 21.38          | 26.37         | 25.79         | 25.55        | 25.08          | 23.12        |
| Fourth-leaf-9 | 22.46         | 20.51                            | 24.72                             | 21.71          | 26.59         | 26.00         | 25.68        | 25.31          | 23.33        |
| Older-leaf-1  | 23.70         | 22.64                            | 26.69                             | 21.95          | 29.73         | 28.26         | 28.10        | 26.64          | 29.53        |
| Older-leaf-2  | 23.80         | 22.50                            | 26.53                             | 21.85          | 29.61         | 28.05         | 28.12        | 26.39          | 29.09        |

|              |       |       |       |       |       |       |       |       |       |
|--------------|-------|-------|-------|-------|-------|-------|-------|-------|-------|
| Older-leaf-3 | 23.54 | 22.24 | 26.52 | 21.78 | 29.19 | 27.85 | 27.92 | 26.36 | 29.18 |
| Older-leaf-4 | 22.24 | 21.33 | 25.55 | 20.97 | 27.80 | 26.67 | 26.60 | 25.43 | 27.45 |
| Older-leaf-5 | 22.11 | 21.01 | 25.25 | 20.80 | 27.99 | 26.42 | 26.42 | 25.05 | 27.20 |
| Older-leaf-6 | 22.65 | 21.37 | 25.85 | 20.75 | 27.99 | 26.71 | 26.68 | 25.21 | 27.61 |
| Older-leaf-7 | 23.11 | 21.82 | 26.14 | 21.34 | 29.22 | 28.07 | 27.38 | 26.11 | 28.69 |
| Older-leaf-8 | 23.11 | 21.87 | 26.02 | 21.34 | 29.16 | 27.98 | 27.63 | 26.07 | 28.73 |
| Older-leaf-9 | 23.02 | 21.73 | 26.17 | 21.43 | 29.49 | 28.17 | 27.62 | 26.28 | 28.86 |
| ABA-1        | 23.43 | 20.57 | 24.95 | 21.81 | 27.05 | 26.40 | 25.81 | 25.79 | 23.24 |
| ABA-2        | 23.45 | 20.67 | 24.84 | 21.69 | 26.93 | 26.31 | 25.74 | 25.71 | 23.14 |
| ABA-3        | 23.34 | 20.39 | 24.74 | 21.65 | 26.88 | 26.24 | 25.60 | 25.58 | 23.06 |
| ABA-4        | 22.82 | 20.18 | 24.60 | 21.67 | 25.90 | 25.22 | 25.00 | 24.83 | 22.19 |
| ABA-5        | 22.74 | 20.06 | 24.44 | 21.38 | 25.80 | 25.24 | 24.87 | 24.49 | 22.18 |
| ABA-6        | 22.75 | 19.97 | 24.49 | 21.64 | 25.85 | 25.37 | 24.73 | 24.72 | 22.23 |
| ABA-7        | 22.39 | 19.82 | 23.89 | 21.07 | 25.66 | 24.71 | 24.51 | 24.52 | 21.92 |
| ABA-8        | 22.27 | 19.78 | 23.94 | 20.91 | 25.68 | 24.74 | 24.43 | 24.35 | 21.80 |
| ABA-9        | 22.44 | 19.53 | 23.46 | 21.00 | 25.46 | 24.46 | 24.41 | 24.38 | 21.91 |
| GA-1         | 23.04 | 20.36 | 24.57 | 21.03 | 26.48 | 26.41 | 25.27 | 25.16 | 22.16 |
| GA-2         | 23.14 | 20.16 | 24.27 | 21.03 | 26.61 | 26.13 | 25.30 | 25.28 | 22.30 |
| GA-3         | 23.07 | 20.35 | 24.73 | 21.23 | 26.63 | 26.33 | 25.72 | 25.39 | 22.22 |
| GA-4         | 22.99 | 20.29 | 24.72 | 21.25 | 26.18 | 25.73 | 25.15 | 25.13 | 22.68 |
| GA-5         | 23.26 | 20.69 | 24.86 | 21.56 | 26.31 | 26.04 | 25.47 | 25.43 | 22.75 |
| GA-6         | 23.22 | 20.31 | 24.66 | 21.30 | 26.22 | 25.93 | 25.39 | 25.29 | 22.69 |
| GA-7         | 23.81 | 21.55 | 25.60 | 22.12 | 27.74 | 27.47 | 26.48 | 25.46 | 24.12 |
| GA-8         | 24.40 | 21.95 | 26.22 | 22.67 | 28.37 | 27.84 | 26.72 | 25.86 | 24.69 |
| GA-9         | 23.99 | 21.80 | 25.99 | 22.47 | 28.11 | 27.65 | 26.83 | 25.75 | 24.62 |
| IAA-1        | 24.67 | 20.22 | 24.21 | 21.63 | 26.66 | 25.87 | 25.85 | 25.89 | 23.14 |
| IAA-2        | 24.66 | 20.18 | 24.27 | 21.51 | 26.62 | 25.76 | 25.83 | 25.76 | 23.00 |
| IAA-3        | 24.77 | 20.16 | 24.56 | 21.69 | 26.50 | 25.45 | 25.50 | 25.70 | 22.97 |
| IAA-4        | 23.45 | 20.26 | 24.56 | 21.37 | 26.38 | 25.85 | 25.43 | 25.35 | 22.53 |
| IAA-5        | 23.12 | 20.10 | 24.66 | 21.32 | 26.48 | 25.69 | 25.25 | 25.36 | 22.52 |
| IAA-6        | 22.86 | 19.97 | 24.43 | 21.00 | 26.35 | 25.70 | 25.73 | 25.23 | 22.56 |
| IAA-7        | 23.06 | 20.11 | 24.71 | 21.08 | 27.15 | 26.29 | 25.81 | 25.54 | 22.87 |
| IAA-8        | 23.17 | 20.15 | 24.63 | 20.82 | 26.96 | 26.25 | 25.82 | 25.65 | 22.99 |
| IAA-9        | 23.25 | 20.31 | 24.69 | 20.95 | 26.91 | 26.50 | 25.85 | 25.80 | 23.10 |
| MJ-1         | 23.12 | 20.78 | 24.96 | 21.47 | 27.38 | 26.72 | 25.98 | 25.87 | 23.30 |
| MJ-2         | 22.89 | 20.24 | 24.50 | 20.99 | 26.82 | 26.17 | 25.70 | 25.50 | 22.92 |
| MJ-3         | 22.87 | 20.34 | 24.59 | 20.89 | 26.91 | 26.32 | 25.72 | 25.48 | 22.97 |
| MJ-4         | 23.14 | 20.58 | 24.64 | 21.30 | 26.72 | 26.10 | 25.63 | 25.20 | 23.61 |
| MJ-5         | 23.06 | 20.66 | 24.82 | 21.14 | 26.67 | 26.10 | 25.52 | 25.20 | 23.53 |
| MJ-6         | 23.03 | 20.38 | 24.52 | 20.96 | 26.50 | 26.07 | 25.41 | 25.19 | 23.26 |
| MJ-7         | 22.35 | 19.67 | 24.08 | 21.78 | 26.05 | 25.09 | 24.82 | 24.61 | 23.09 |
| MJ-8         | 22.32 | 19.68 | 24.11 | 21.78 | 25.92 | 25.28 | 24.93 | 24.57 | 23.30 |
| MJ-9         | 22.10 | 19.52 | 24.56 | 21.65 | 25.78 | 25.01 | 24.79 | 24.53 | 22.87 |
| SA-1         | 23.21 | 20.02 | 24.66 | 21.05 | 27.02 | 26.31 | 25.90 | 25.33 | 23.53 |



|      |       |       |       |       |       |       |       |       |       |
|------|-------|-------|-------|-------|-------|-------|-------|-------|-------|
| SA-2 | 23.65 | 20.47 | 24.79 | 21.26 | 27.19 | 26.59 | 26.23 | 25.43 | 23.67 |
| SA-3 | 23.71 | 20.44 | 25.07 | 21.41 | 27.35 | 26.70 | 26.02 | 25.68 | 23.70 |
| SA-4 | 23.30 | 20.42 | 24.95 | 20.48 | 26.87 | 26.26 | 25.58 | 25.48 | 23.55 |
| SA-5 | 23.32 | 20.52 | 24.98 | 20.52 | 26.96 | 26.40 | 25.73 | 25.68 | 23.67 |
| SA-6 | 23.51 | 20.79 | 25.14 | 20.48 | 27.21 | 26.38 | 25.96 | 25.78 | 23.80 |
| SA-7 | 22.65 | 20.00 | 24.33 | 20.49 | 26.53 | 25.99 | 25.25 | 24.27 | 22.94 |
| SA-8 | 22.47 | 20.78 | 25.00 | 20.33 | 27.27 | 26.72 | 25.86 | 25.08 | 23.97 |
| SA-9 | 22.51 | 20.01 | 24.42 | 20.54 | 26.68 | 26.11 | 25.42 | 24.48 | 23.08 |

---

**Table S3.** Data statistics of Cq values of candidate reference genes.

|                                   | N Total | Median | Ar Mean | Std Dev | Minimum | Maximum |
|-----------------------------------|---------|--------|---------|---------|---------|---------|
| <i>CsACT7</i>                     | 72      | 22.87  | 22.92   | 1.41    | 21.5    | 24.77   |
| <i>CsEF-1<math>\alpha</math></i>  | 72      | 20.21  | 20.34   | 1.39    | 19.24   | 22.64   |
| <i>CseIF-4<math>\alpha</math></i> | 72      | 24.56  | 24.66   | 1.37    | 23.46   | 26.69   |
| <i>CsGAPDH</i>                    | 72      | 21.42  | 21.54   | 1.43    | 20.33   | 23.53   |
| <i>CsPP2A</i>                     | 72      | 26.59  | 26.78   | 1.54    | 25.46   | 29.73   |
| <i>CsSAND</i>                     | 72      | 25.85  | 25.93   | 1.59    | 24.46   | 28.26   |
| <i>CsTBP</i>                      | 72      | 25.53  | 25.64   | 1.43    | 24.41   | 28.12   |
| <i>CsTIP41</i>                    | 72      | 25.19  | 25.17   | 1.36    | 24.05   | 26.64   |
| <i>CsTUB</i>                      | 72      | 22.88  | 23.4    | 2.21    | 21.74   | 29.53   |
